# Supplementary material for: Modern Metaproteomics: A Unique Tool to Characterize the Active Microbiome in Health and Diseases, and Pave the Road towards New Biomarkers—Example of Crohn’s Disease and Ulcerative Colitis Flare-Ups
Source: MDPI journal article supplement (doi:10.3390/cells11081340), 2022-04-14
Supplement: s1 [file s1]

**Table S1.** Wilcoxon tests with Benjamini-Hochberg stepwise adjustment for multiple pairwise comparisons between clinical groups (adjusted p-value threshold = 0.05). Variables in the left- and right-hand column are those illustrated on Figure 2a and Figure 2b, respectively. Significant pairwise comparisons are in bold characters.

#### subgrp.ALL

|      | CDC            | CDIC           | CTRL           |
|------|----------------|----------------|----------------|
| CDIC | 0.60952        | -              | -              |
| CTRL | <b>0.00032</b> | <b>0.00991</b> | -              |
| UC   | 0.28693        | 0.28693        | <b>5.8e-07</b> |

#### subgrp.bact

|      | CDC           | CDIC          | CTRL           |
|------|---------------|---------------|----------------|
| CDIC | 0.4762        | -             | -              |
| CTRL | <b>0.0027</b> | <b>0.0099</b> | -              |
| UC   | 0.1556        | 0.1186        | <b>8.3e-08</b> |

#### subgrp.phylum

|      | CDC            | CDIC           | CTRL           |
|------|----------------|----------------|----------------|
| CDIC | 0.47619        | -              | -              |
| CTRL | <b>0.00032</b> | <b>0.00991</b> | -              |
| UC   | 0.15560        | 0.11863        | <b>8.3e-08</b> |

#### n.phyla

|      | CDC  | CDIC | CTRL |
|------|------|------|------|
| CDIC | 0.34 | -    | -    |
| CTRL | 0.34 | 0.83 | -    |
| UC   | 0.87 | 0.34 | 0.34 |

#### subgrp.class

|      | CDC            | CDIC           | CTRL           |
|------|----------------|----------------|----------------|
| CDIC | 0.47619        | -              | -              |
| CTRL | <b>0.00032</b> | <b>0.00991</b> | -              |
| UC   | 0.15560        | 0.11863        | <b>8.3e-08</b> |

#### n.classes

|      | CDC   | CDIC  | CTRL  |
|------|-------|-------|-------|
| CDIC | 0.293 | -     | -     |
| CTRL | 0.227 | 0.654 | -     |
| UC   | 0.639 | 0.186 | 0.057 |

#### subgrp.order

|      | CDC            | CDIC           | CTRL           |
|------|----------------|----------------|----------------|
| CDIC | 0.47619        | -              | -              |
| CTRL | <b>0.00032</b> | <b>0.00991</b> | -              |
| UC   | 0.15560        | 0.11863        | <b>8.3e-08</b> |

#### n.orders

|      | CDC   | CDIC  | CTRL  |
|------|-------|-------|-------|
| CDIC | 0.425 | -     | -     |
| CTRL | 0.199 | 0.849 | -     |
| UC   | 0.548 | 0.199 | 0.055 |

#### subgrp.family

|      | CDC           | CDIC          | CTRL           |
|------|---------------|---------------|----------------|
| CDIC | 0.4762        | -             | -              |
| CTRL | <b>0.0024</b> | <b>0.0187</b> | -              |
| UC   | 0.1556        | 0.1186        | <b>2.1e-05</b> |

#### n.families

|      | CDC  | CDIC | CTRL |
|------|------|------|------|
| CDIC | 0.20 | -    | -    |
| CTRL | 0.14 | 0.70 | -    |
| UC   | 0.70 | 0.20 | 0.14 |

#### subgrp.genus

|      | CDC            | CDIC           | CTRL           |
|------|----------------|----------------|----------------|
| CDIC | 0.47619        | -              | -              |
| CTRL | <b>0.00032</b> | <b>0.00991</b> | -              |
| UC   | 0.13121        | 0.11863        | <b>8.3e-08</b> |

#### n.genera

|      | CDC    | CDIC   | CTRL          |
|------|--------|--------|---------------|
| CDIC | 0.4229 | -      | -             |
| CTRL | 0.1650 | 0.6029 | -             |
| UC   | 0.3111 | 0.3111 | <b>0.0071</b> |

#### subgrp.species

|      | CDC            | CDIC           | CTRL           |
|------|----------------|----------------|----------------|
| CDIC | 0.60952        | -              | -              |
| CTRL | <b>0.00056</b> | <b>0.00330</b> | -              |
| UC   | 0.13121        | 0.11863        | <b>8.3e-08</b> |

#### n.species

|      | CDC     | CDIC    | CTRL           |
|------|---------|---------|----------------|
| CDIC | 0.60952 | -       | -              |
| CTRL | 0.06676 | 0.25362 | -              |
| UC   | 0.19450 | 0.15817 | <b>0.00016</b> |

#### subgrp.human

|      | CDC           | CDIC          | CTRL           |
|------|---------------|---------------|----------------|
| CDIC | 0.4762        | -             | -              |
| CTRL | <b>0.0200</b> | <b>0.0012</b> | -              |
| UC   | <b>0.0391</b> | <b>0.0157</b> | <b>8.3e-08</b> |

#### n.ko

|      | CDC           | CDIC          | CTRL         |
|------|---------------|---------------|--------------|
| CDIC | 0.2143        | -             | -            |
| CTRL | <b>0.0092</b> | 0.4495        | -            |
| UC   | 0.2143        | <b>0.0092</b> | <b>8e-06</b> |
