# Supplementary material for: Modern Metaproteomics: A Unique Tool to Characterize the Active Microbiome in Health and Diseases, and Pave the Road towards New Biomarkers—Example of Crohn’s Disease and Ulcerative Colitis Flare-Ups
Source: MDPI journal article supplement (doi:10.3390/cells11081340), 2022-04-14
Supplement: s1 [file s1]

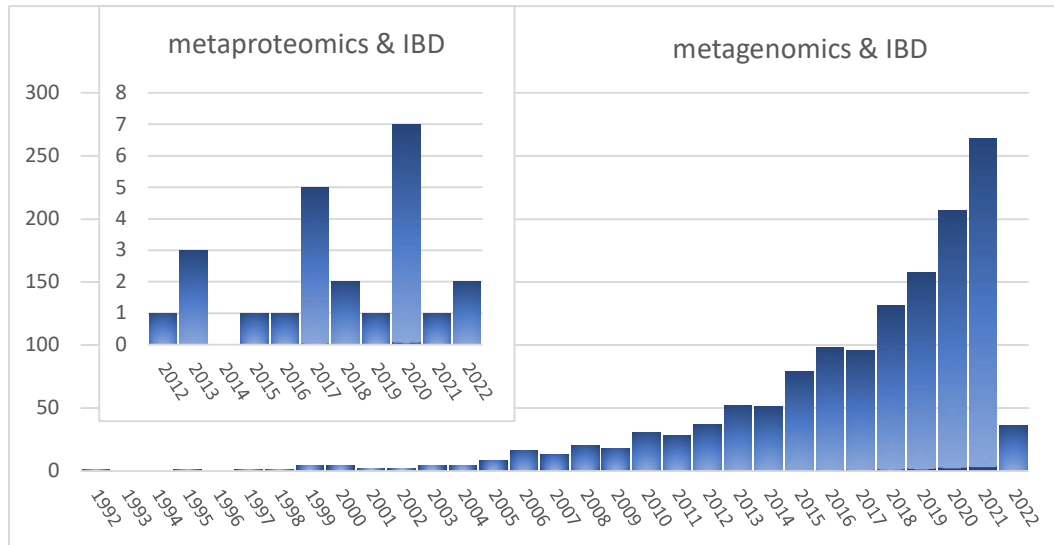

**Figure S1.** Number of metagenomics and metaproteomics studies related to inflammatory bowel diseases identified in pubmed.ncbi over the 30 last years. Search query for metagenomics: (((IBD[Title/Abstract]) OR (inflammatory bowel disease[Title/Abstract]) OR (Crohn[Title/Abstract]) OR (ulcerative colitis[Title/Abstract])) AND (((metagenomics[Title/Abstract]) OR (shotgun sequencing[Title/Abstract]) OR (16S[Title/Abstract])))). Search query for metaproteomics: Search query: (((IBD[Title/Abstract]) OR (inflammatory bowel disease[Title/Abstract]) OR (Crohn[Title/Abstract]) OR (ulcerative colitis[Title/Abstract])) AND ((metagenomics[Title/Abstract]) OR (shotgun sequencing[Title/Abstract]) OR (16S[Title/Abstract]))).
