# Supplementary material for: Modern Metaproteomics: A Unique Tool to Characterize the Active Microbiome in Health and Diseases, and Pave the Road towards New Biomarkers—Example of Crohn’s Disease and Ulcerative Colitis Flare-Ups
Source: MDPI journal article supplement (doi:10.3390/cells11081340), 2022-04-14
Supplement: s1 [file s1]

**Table S2.** Wilcoxon tests with Benjamini-Hochberg stepwise adjustment for multiple pairwise comparisons between clinical groups (adjusted p-value threshold = 0.05. Variables are those illustrated on Figure 3, i.e. sum of specific spectra (SC) per species, then packed into phyla. Only phyla for which Kruskal-Wallis test was significant are reported. Significant pairwise comparisons are in bold characters.

# **Abundance**

sum\_SC in the phylum  
*Firmicutes*

|      | CDC            | CDIC           | CTRL           |
|------|----------------|----------------|----------------|
| CDIC | 0.47619        | -              | -              |
| CTRL | <b>0.00056</b> | <b>0.04396</b> | -              |
| UC   | <b>0.04396</b> | 0.12157        | <b>8.3e-08</b> |

sum\_SC in the phylum  
*Proteobacteria*

|      | CDC           | CDIC          | CTRL   |
|------|---------------|---------------|--------|
| CDIC | <b>0.0190</b> | -             | -      |
| CTRL | 0.5265        | <b>0.0087</b> | -      |
| UC   | 0.7181        | <b>0.0078</b> | 0.2099 |

sum\_SC in the phylum  
*Bacteroidetes*

|      | CDC    | CDIC   | CTRL          |
|------|--------|--------|---------------|
| CDIC | 0.4229 | -      | -             |
| CTRL | 0.3462 | 0.6167 | -             |
| UC   | 0.3057 | 0.2373 | <b>0.0021</b> |

sum\_SC in unclassified  
bacteria

|      | CDC   | CDIC  | CTRL         |
|------|-------|-------|--------------|
| CDIC | 0.476 | -     | -            |
| CTRL | 0.166 | 0.166 | -            |
| UC   | 0.476 | 0.396 | <b>0.015</b> |

sum\_SC for human proteins

|      | CDC          | CDIC         | CTRL           |
|------|--------------|--------------|----------------|
| CDIC | 0.257        | -            | -              |
| CTRL | <b>0.010</b> | 0.146        | -              |
| UC   | 0.061        | <b>0.016</b> | <b>2.5e-06</b> |

number\_Subgroups in the phylum  
*Firmicutes*

|      | CDC           | CDIC          | CTRL           |
|------|---------------|---------------|----------------|
| CDIC | 0.7619        | -             | -              |
| CTRL | <b>0.0024</b> | <b>0.0058</b> | -              |
| UC   | 0.0933        | 0.1522        | <b>1.7e-07</b> |

number\_Subgroups in the phylum  
*Proteobacteria*

|      | CDC           | CDIC          | CTRL   |
|------|---------------|---------------|--------|
| CDIC | <b>0.0278</b> | -             | -      |
| CTRL | 0.3416        | <b>0.0087</b> | -      |
| UC   | 0.7104        | <b>0.0087</b> | 0.1056 |

number\_Subgroups in the phylum  
*Bacteroidetes*

|      | CDC  | CDIC | CTRL        |
|------|------|------|-------------|
| CDIC | 0.42 | -    | -           |
| CTRL | 0.25 | 0.75 | -           |
| UC   | 0.42 | 0.25 | <b>0.03</b> |

number\_Subgroups in unclassified  
bacteria

|      | CDC    | CDIC   | CTRL          |
|------|--------|--------|---------------|
| CDIC | 0.6689 | -      | -             |
| CTRL | 0.0643 | 0.1033 | -             |
| UC   | 0.4066 | 0.4066 | <b>0.0046</b> |

number\_Subgroups human proteins

|      | CDC           | CDIC          | CTRL           |
|------|---------------|---------------|----------------|
| CDIC | 0.4762        | -             | -              |
| CTRL | <b>0.0224</b> | <b>0.0012</b> | -              |
| UC   | <b>0.0391</b> | <b>0.0157</b> | <b>8.3e-08</b> |

# **Diversity**
