# Supplementary material for: Modern Metaproteomics: A Unique Tool to Characterize the Active Microbiome in Health and Diseases, and Pave the Road towards New Biomarkers—Example of Crohn’s Disease and Ulcerative Colitis Flare-Ups
Source: MDPI journal article supplement (doi:10.3390/cells11081340), 2022-04-14
Supplement: s1 [file s1]

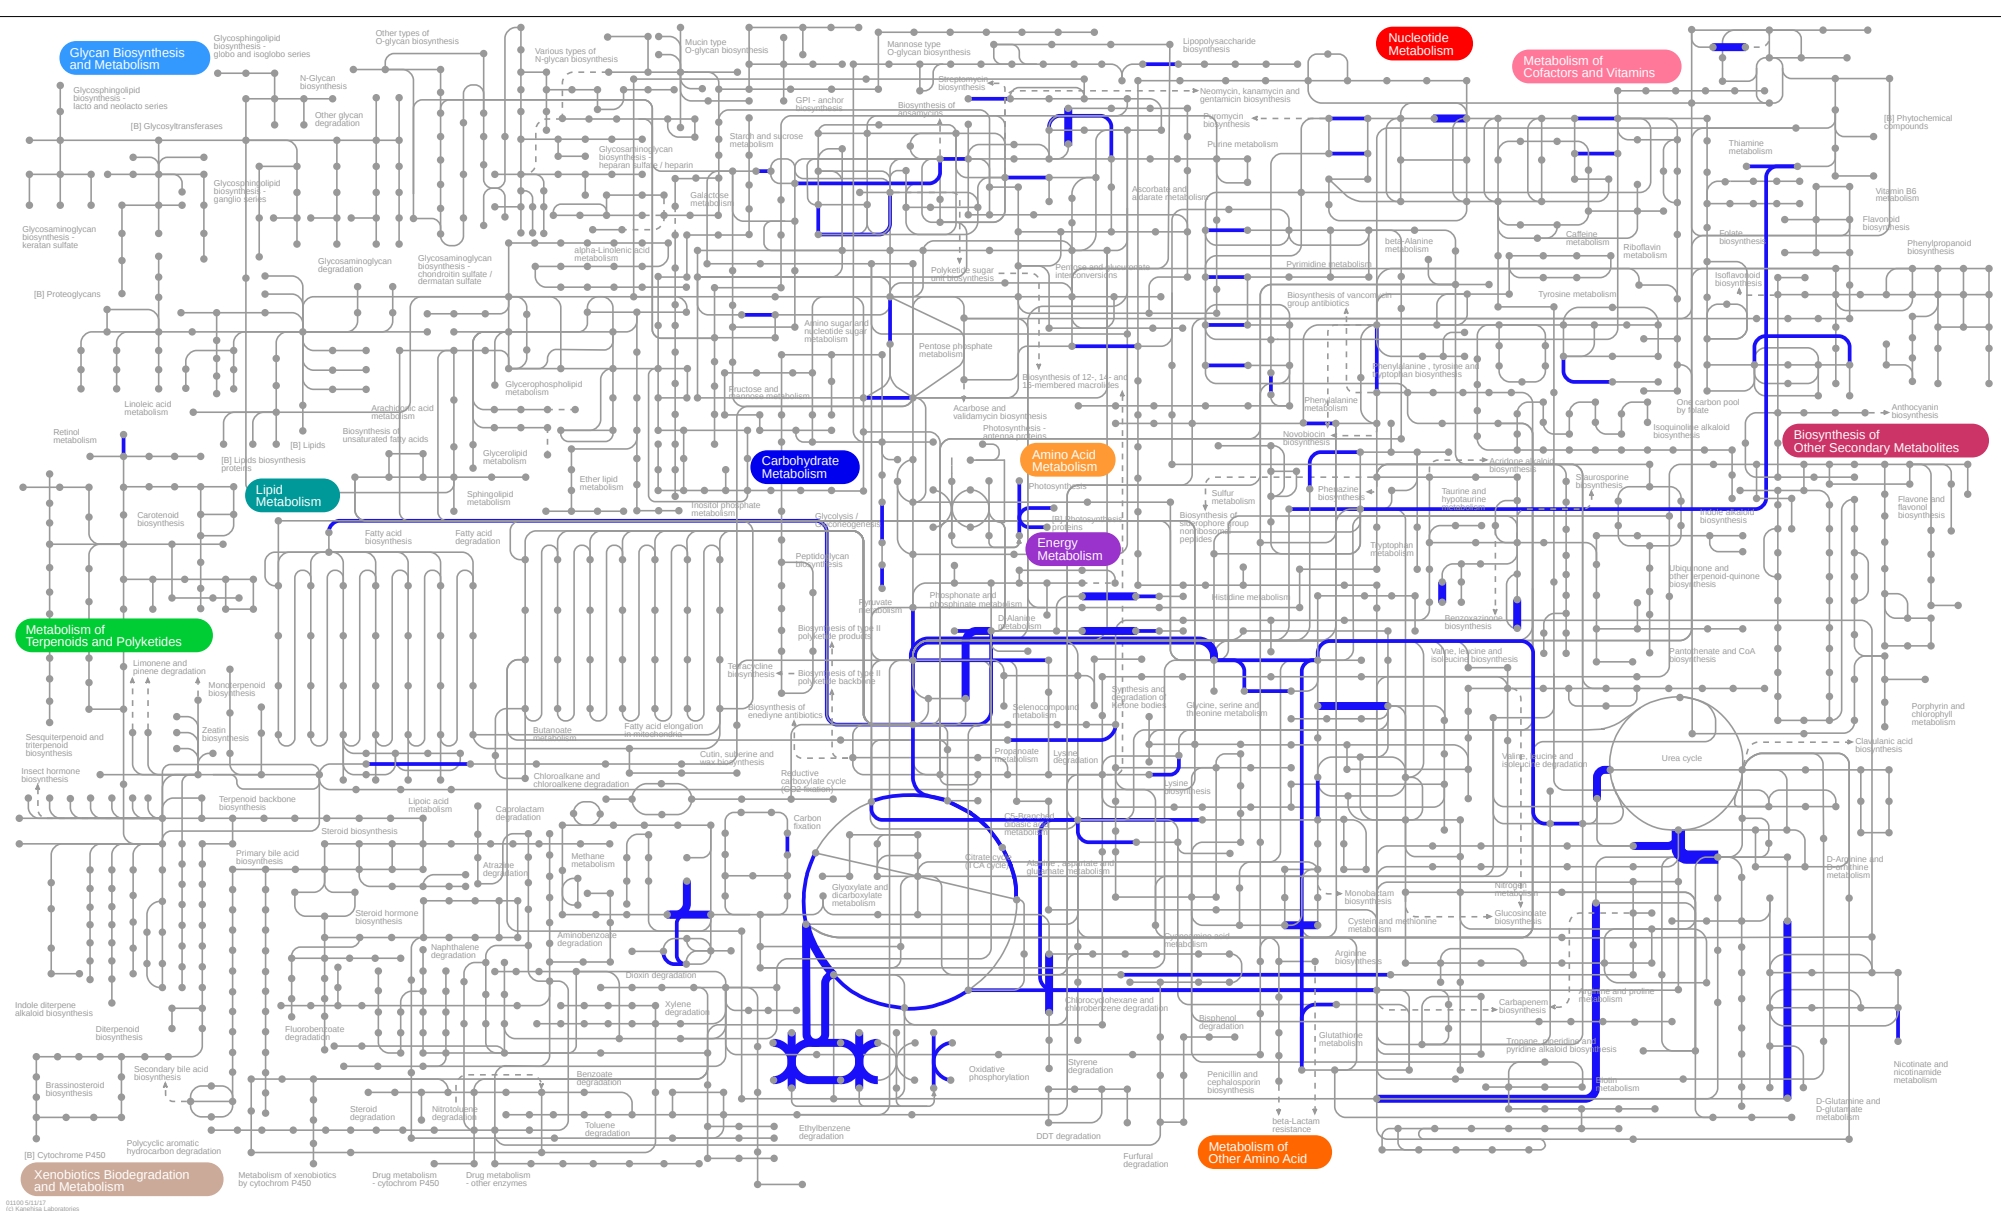

**Figure S3f.** Metabolic pathways overrepresented in *Proteobacteria* cell envelopes of UC microbiota, compared to controls.











































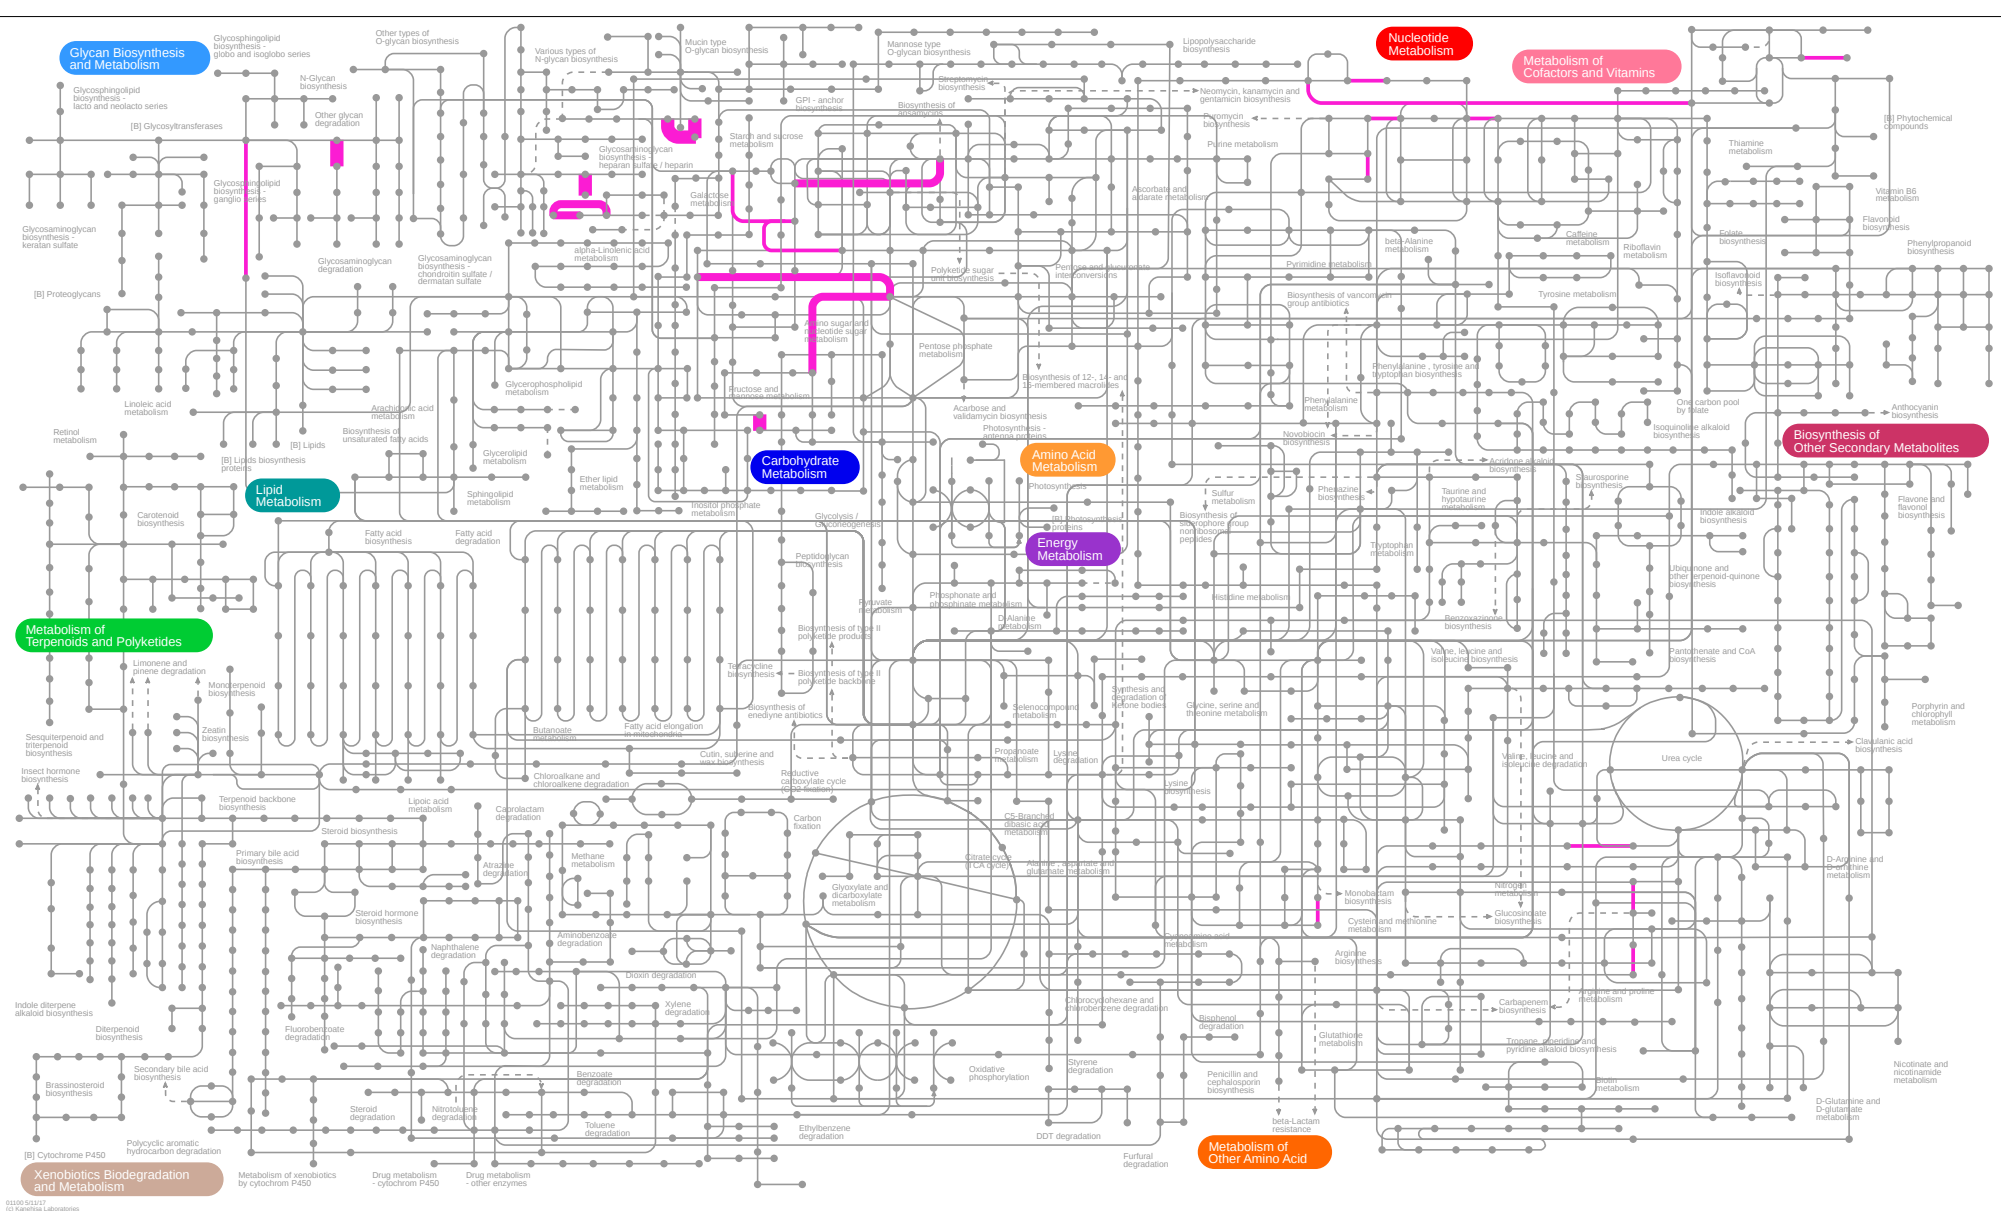

**Figure S3x.** Metabolic pathways overrepresented in *Actinobacteria* cell envelopes of CDC microbiota, compared to controls.
